# Supplementary material for: Renal Tubular Epithelial TRPA1 Acts as An Oxidative Stress Sensor to Mediate Ischemia-Reperfusion-Induced Kidney Injury through MAPKs/NF-κB Signaling
Source: PubMed Central journal article supplement (PMC7956664; doi:10.3390/ijms22052309), 2021-02-25
Supplement: ijms-22-02309-s001.pdf [file ijms-22-02309-s001.pdf]

# **Renal tubular epithelial TRPA1 acts as an oxidative stress sensor to mediate ischemia-reperfusion-induced kidney injury through MAPKs/NF- $\kappa$ B signaling**

**Chung-Kuan Wu<sup>1,2</sup>, Chia-Lin Wu<sup>3,4</sup>, Tzong-Shyuan Lee<sup>5</sup>, Yu-Ru Kou<sup>6\*</sup> and Der-Cherng Tarng<sup>6,7,8,9\*</sup>**

<sup>1</sup> Division of Nephrology, Department of Internal Medicine, Shin-Kong Wu Ho-Su Memorial Hospital, Taipei 111, Taiwan; chungkuan.wu@gmail.com

<sup>2</sup> School of Medicine, Fu-Jen Catholic University, New Taipei 242, Taiwan; chungkuan.wu@gmail.com

<sup>3</sup> Division of Nephrology, Department of Internal Medicine, Changhua Christian Hospital, Changhua 500, Taiwan; 143843@cch.org.tw

<sup>4</sup> School of Medicine, Chung-Shan Medical University, Taichung 402, Taiwan; 143843@cch.org.tw

<sup>5</sup> Department of Physiology, College of Medicine, National Taiwan University, Taipei 106, Taiwan; ntutslee@ntu.edu.tw

<sup>6</sup> Department of Institute of Physiology, School of Medicine, National Yang-Ming University, Taipei 112, Taiwan; yrkou@ym.edu.tw (Y.R.K.); dctarng@vghtpe.gov.tw (D.-C.T.)

<sup>7</sup> Department of Biological Science and Technology, National Chiao Tung University, Hsinchu 300, Taiwan; and Center for Intelligent Drug Systems and Smart Bio-devices (IDS2B), Hsinchu 300, Taiwan; dctarng@vghtpe.gov.tw

<sup>8</sup> Division of Nephrology, Department of Medicine, Taipei Veterans General Hospital, Taipei 112, Taiwan; dctarng@vghtpe.gov.tw

<sup>9</sup> Institute of Clinical Medicine, National Yang-Ming University, Taipei 112, Taiwan; dctarng@vghtpe.gov.tw

\* Correspondence: yrkou@ym.edu.tw; Tel: +886-2-2867086; Fax: +886-2-2864049 and dctarng@vghtpe.gov.tw; Tel: +886-2-28757517; Fax: +886-2-28757841

**Table S1.** Antibodies used for Western blot, and immunohistochemical staining; kits used for enzyme linked immunosorbent assay

| Target         | Figure     | Source                                            | App     |
|----------------|------------|---------------------------------------------------|---------|
| TRPA1          | 1, 2, 5, 6 | Rabbit Ab, Novus Biologicals (Littleton, CO, USA) | IHC, WB |
| 8-OHdG         | 1          | Mouse Ab, Abcam (Cambridge, UK)                   | IHC     |
| $\beta$ -actin | 2, 5, 6    | Mouse Ab, Proteintech Group (Chicago, IL, USA)    | WB      |
| ERK            | 9          | Rabbit Ab, Proteintech Group (Chicago, IL, USA)   | WB      |
| c-JNK          |            |                                                   |         |
| P65            |            |                                                   |         |
| H1             |            |                                                   |         |
| Phospho-ERK    | 9          | EnoGene Biotech (New York, NY, USA)               | WB      |
| Phospho-JNK    |            |                                                   |         |
| Mouse NGAL     | 4          | Bioporto (Hellerup, Denmark)                      | ELISA   |
| Mouse MCP-1    | 4          | PeptoTech (Rocky Hill, NJ, USA)                   | ELISA   |
| Mouse MIP-2    | 4          | MyBioSource (San Deigo, CA,USA)                   | ELISA   |
| Human IL-8     | 6,9        | Koma Biotech (Seoul, South Korea)                 | ELISA   |

Abbreviations: TRPA1, transient receptor potential ankyrin 1; 8-OHdG, 8-hydroxy-2-deoxyguanosine; ERK, extracellular signal-regulated kinases; c-JNK, c-Jun N-terminal kinases; P65, a subunit of NF- $\kappa$ B transcription complex; H1, histone protein 1; NGAL, neutrophil gelatinase-associated lipocalin; MCP-1, monocyte chemoattractant protein 1; MIP-2, macrophage inflammatory protein 2; IL-8, interleukin-8; Ab, antibody; App, application; WB, Western blot; IHC, immunohistochemical staining; ELISA, enzyme linked immunosorbent assay

**Table S2.** List of reagents, vehicles used to dilute the tested drugs, and companies

| Reagents                         | Vehicles                                    | Companies                                      |
|----------------------------------|---------------------------------------------|------------------------------------------------|
| EGTA                             | NaOH                                        | Sigma Aldrich (Merck KGaA, Darmstadt, Germany) |
| NAC                              | H <sub>2</sub> O                            |                                                |
| Apocynin                         | DMSO                                        |                                                |
| BAY11-7085                       |                                             |                                                |
| HC-030031                        |                                             |                                                |
| PD98059                          |                                             |                                                |
| SP600125                         | Calbiochem (Merck KGaA, Darmstadt, Germany) |                                                |
| DMEM                             | /                                           | Corning Mediatech, Manassas, VA, USA           |
| Penicillin-streptomycin solution |                                             |                                                |
| FBS                              |                                             | Thermo Fisher Scientific, Waltham, MA, USA     |
| PAS staining kit                 |                                             | Merck Millipore, Billerica, MA, USA            |
| siRNA transfection reagent       |                                             | GE Healthcare Life Sciences                    |

Abbreviations: EGTA, ethylene glycol-tetraacetic acid; NAC, N-acetyl-cysteine; DMEM, Dulbecco's Modified Eagle Medium; FBS, fetal bovine serum; PAS, periodic acid-Schiff; DMSO, dimethyl sulfoxide; N/A, not available.

**Table S3.** The clinical information of the biopsy-proven ATN patients.

| No          | Age           | Gender     | DM         | HTN        | AKIN        | TIS         | TRPA1 expression | 8-OHdG expression |
|-------------|---------------|------------|------------|------------|-------------|-------------|------------------|-------------------|
| 1           | 73.8          | 1          | 0          | 0          | 3           | 3           | 0.244            | 0.253             |
| 2           | 70.3          | 1          | 1          | 1          | 3           | 4           | 0.356            | 0.267             |
| 3           | 35.5          | 1          | 0          | 0          | 3           | 4           | 0.341            | 0.263             |
| 4           | 35.2          | 1          | 0          | 0          | 3           | 4           | 0.312            | 0.255             |
| 5           | 19.4          | 0          | 0          | 0          | 2           | 4           | 0.312            | 0.252             |
| 6           | 69.6          | 1          | 1          | 0          | 3           | 2           | 0.215            | 0.229             |
| 7           | 73.4          | 0          | 0          | 1          | 1           | 2           | 0.194            | 0.242             |
| 8           | 72.3          | 1          | 0          | 1          | 3           | 1           | 0.194            | 0.218             |
| 9           | 58.9          | 0          | 0          | 0          | 1           | 1           | 0.182            | 0.235             |
| 10          | 56.0          | 1          | 1          | 0          | 2           | 1           | 0.152            | 0.204             |
| <b>Data</b> | 56.4<br>±19.6 | 7<br>(70%) | 7<br>(70%) | 3<br>(30%) | 2.4<br>±0.8 | 2.6<br>±1.3 | 0.250<br>±0.073  | 0.241<br>±0.020   |

The codes of binary variables are that gender (male=1, female=0), DM (patients with history of type 2 DM=1, patients without type 2 DM=0), HTN (patients with history of HTN=1, patients without HTN=0), respectively. AKIN: Acute kidney injury network for classification of severity of acute kidney injury (AKI); TIS: tubular injury score; Data are expressed as *n* (%) for categorical data and as mean ± standard deviation for continuous data in the Data Row.

**Table S4.** List of the siTRPA1 component

| Name        | Target Sequences (sense) | Antisense            |
|-------------|--------------------------|----------------------|
| D-006109-01 | GAAGGACGCUCUCCACUUA      | UAAGUGGAGAGCGUCCUUC  |
| D-006109-02 | GGACAAUGGUGCACAAUA       | UAUUUGUGCACCAUUGUCC  |
| D-006109-03 | GGCAAUAAAUGUGCAAUUA      | UAAUUGCACAUUUUUAUGCC |
| D-006109-04 | UCAAAGAGCUGGUAAUGGA      | UCCAUUACCAGCUCUUUGA  |
